# Supplementary material for: Synthesis of a rhodium(i) germyl complex: a useful tool for C–H and C–F bond activation reactions
Source: Royal Society of Chemistry journal article supplement (doi:10.1039/c5dt04845a), 2016-01-01
Supplement: c5dt04845a1.pdf [file c5dt04845a1.pdf]

## Supporting Information

### Synthesis of a Rhodium(I) Germyl Complex: A Useful Tool for C–H and C–F Bond Activation Reactions

Theresia Ahrens, Mike Ahrens, Thomas Braunt, Beatrice Braun and Roy Herrmann

†Humboldt-Universität zu Berlin, Department of Chemistry, Brook-Taylor-Straße 2, D-12489 Berlin, Germany.  
E-mail: thomas.braun@chemie.hu-berlin.de

#### Computational details

In order to determine the IR absorption bands of complex  $[\text{Rh}(\text{GePh}_3)(\text{H})_2(\text{PEt}_3)_3]$  (**2**) with the help of DFT calculations, the structure of **2** was optimized based on the structure in the solid, which was obtained by a X-ray crystallography analysis. Two absorption bands can be assigned to the metal-bonded hydrido ligands which are in good accordance to the experimental IR-spectrum. For the antisymmetric vibration an absorption band at  $\tilde{\nu} = 2062 \text{ cm}^{-1}$  was identified. The symmetric vibration was located at  $\tilde{\nu} = 2108 \text{ cm}^{-1}$ . The calculations were run using the Gaussian 09 (Revision D.01) program package<sup>[1]</sup> and the B3LYP functional. Rhodium<sup>[2]</sup> and Germanium<sup>[3]</sup> were described with RECPs and the associated cc-pVDZ basis sets. For all other atoms cc-pVDZ basis sets were used. The calculated structure was identified as a minimum (no negative eigenvalues). The resulting energy was corrected for zero-point energy. Cartesian coordinates for the optimized structure are given below.

| Optimized cartesian coordinates for complex<br>$[\text{Rh}(\text{GePh}_3)(\text{H})_2(\text{PEt}_3)_3]$ ( <b>2</b> ), energies are corrected for<br>zero-point energy and given in Hartree: |          |          |          |
|---------------------------------------------------------------------------------------------------------------------------------------------------------------------------------------------|----------|----------|----------|
| Energy: -2837.441091                                                                                                                                                                        |          |          |          |
| Rh                                                                                                                                                                                          | 0.83605  | -0.16250 | 0.07044  |
| Ge                                                                                                                                                                                          | -1.67008 | -0.28076 | 0.14399  |
| H                                                                                                                                                                                           | 0.51502  | -0.70754 | 1.51329  |
| H                                                                                                                                                                                           | 0.36774  | -1.58080 | -0.44905 |
| P                                                                                                                                                                                           | 1.04067  | 0.43960  | -2.32078 |
| P                                                                                                                                                                                           | 1.17756  | 1.99005  | 1.23067  |
| P                                                                                                                                                                                           | 2.89914  | -1.36080 | 0.49682  |
| C                                                                                                                                                                                           | -2.38156 | -1.67647 | 1.42357  |
| C                                                                                                                                                                                           | -1.59006 | -2.33645 | 2.37685  |
| H                                                                                                                                                                                           | -0.52541 | -2.09885 | 2.44057  |
| C                                                                                                                                                                                           | -2.12709 | -3.29871 | 3.24232  |
| H                                                                                                                                                                                           | -1.48162 | -3.79440 | 3.97308  |
| C                                                                                                                                                                                           | -3.48258 | -3.62678 | 3.17051  |
| H                                                                                                                                                                                           | -3.90648 | -4.37776 | 3.84225  |
| C                                                                                                                                                                                           | -4.29178 | -2.98705 | 2.22548  |
| H                                                                                                                                                                                           | -5.35399 | -3.23745 | 2.15491  |
| C                                                                                                                                                                                           | -3.74509 | -2.02923 | 1.36583  |
| H                                                                                                                                                                                           | -4.39794 | -1.55028 | 0.63095  |
| C                                                                                                                                                                                           | -2.59563 | -0.92982 | -1.53680 |
| C                                                                                                                                                                                           | -2.39388 | -2.26367 | -1.94284 |
| H                                                                                                                                                                                           | -1.74122 | -2.91309 | -1.35143 |
| C                                                                                                                                                                                           | -3.01746 | -2.78904 | -3.07867 |
| H                                                                                                                                                                                           | -2.84633 | -3.83167 | -3.36112 |
| C                                                                                                                                                                                           | -3.86296 | -1.98390 | -3.85062 |
| H                                                                                                                                                                                           | -4.35194 | -2.38952 | -4.74001 |
| C                                                                                                                                                                                           | -4.08370 | -0.65993 | -3.46484 |
| H                                                                                                                                                                                           | -4.75267 | -0.02321 | -4.05078 |
| C                                                                                                                                                                                           | -3.46100 | -0.14505 | -2.31910 |
| H                                                                                                                                                                                           | -3.67587 | 0.88574  | -2.02722 |
| C                                                                                                                                                                                           | -2.76417 | 1.35091  | 0.65248  |
| C                                                                                                                                                                                           | -2.75686 | 2.51879  | -0.13595 |
| H                                                                                                                                                                                           | -2.17127 | 2.54792  | -1.05815 |
| C                                                                                                                                                                                           | -3.48536 | 3.65926  | 0.22259  |
| H                                                                                                                                                                                           | -3.46160 | 4.54457  | -0.41924 |
| C                                                                                                                                                                                           | -4.24095 | 3.66660  | 1.39878  |
| H                                                                                                                                                                                           | -4.80902 | 4.55510  | 1.68571  |
| C                                                                                                                                                                                           | -4.26277 | 2.52231  | 2.20078  |
| H                                                                                                                                                                                           | -4.85122 | 2.51209  | 3.12262  |
| C                                                                                                                                                                                           | -3.53749 | 1.38354  | 1.82897  |
| H                                                                                                                                                                                           | -3.57803 | 0.50269  | 2.47360  |
| C                                                                                                                                                                                           | -0.09968 | 1.80463  | -2.93556 |
| H                                                                                                                                                                                           | -1.11224 | 1.43165  | -2.71517 |
| H                                                                                                                                                                                           | 0.06245  | 2.66659  | -2.27190 |
| C                                                                                                                                                                                           | -0.01605 | 2.24697  | -4.40079 |
| H                                                                                                                                                                                           | 0.96911  | 2.66760  | -4.65835 |
| H                                                                                                                                                                                           | -0.76518 | 3.03160  | -4.59926 |
| H                                                                                                                                                                                           | -0.22309 | 1.42138  | -5.09867 |
| C                                                                                                                                                                                           | 0.56293  | -0.92108 | -3.51975 |
| H                                                                                                                                                                                           | -0.51156 | -1.09730 | -3.36412 |
| H                                                                                                                                                                                           | 0.68331  | -0.52218 | -4.54066 |
| C                                                                                                                                                                                           | 1.32490  | -2.23999 | -3.38737 |
| H                                                                                                                                                                                           | 2.41074  | -2.11625 | -3.53752 |
| H                                                                                                                                                                                           | 0.97154  | -2.96143 | -4.14234 |
| H                                                                                                                                                                                           | 1.16298  | -2.68789 | -2.39627 |
| C                                                                                                                                                                                           | 2.67598  | 0.93395  | -3.11208 |
| H                                                                                                                                                                                           | 3.36012  | 0.08590  | -2.95927 |
| H                                                                                                                                                                                           | 2.50770  | 1.00172  | -4.19992 |
| C                                                                                                                                                                                           | 3.31760  | 2.22306  | -2.59859 |
| H                                                                                                                                                                                           | 2.68423  | 3.10306  | -2.79715 |
| H                                                                                                                                                                                           | 4.28696  | 2.40189  | -3.09333 |
| H                                                                                                                                                                                           | 3.49948  | 2.18152  | -1.51470 |
| C                                                                                                                                                                                           | 0.00184  | 2.32386  | 2.65457  |
| H                                                                                                                                                                                           | 0.26598  | 3.30955  | 3.07202  |

|   |          |          |          |
|---|----------|----------|----------|
| H | -0.99793 | 2.41979  | 2.20672  |
| C | -0.03016 | 1.28261  | 3.77466  |
| H | -0.33419 | 0.29480  | 3.39965  |
| H | -0.75745 | 1.58394  | 4.54633  |
| H | 0.94751  | 1.17480  | 4.27248  |
| C | 2.79247  | 2.33422  | 2.13618  |
| H | 2.63701  | 3.22225  | 2.77184  |
| H | 2.93254  | 1.48672  | 2.82482  |
| C | 4.03997  | 2.52379  | 1.27268  |
| H | 4.22370  | 1.65558  | 0.62195  |
| H | 4.93433  | 2.66114  | 1.90325  |
| H | 3.95917  | 3.41078  | 0.62452  |
| C | 0.94659  | 3.57190  | 0.24115  |
| H | 1.62594  | 3.49152  | -0.62176 |
| H | -0.07560 | 3.49520  | -0.16161 |
| C | 1.13364  | 4.92638  | 0.93375  |
| H | 0.41718  | 5.07478  | 1.75577  |
| H | 0.97121  | 5.74481  | 0.21243  |
| H | 2.14848  | 5.05283  | 1.34340  |
| C | 2.53278  | -3.19937 | 0.37350  |

|   |         |          |          |
|---|---------|----------|----------|
| H | 1.65665 | -3.34746 | 1.02497  |
| H | 2.15592 | -3.34468 | -0.65058 |
| C | 3.62213 | -4.22907 | 0.68763  |
| H | 4.45213 | -4.18792 | -0.03429 |
| H | 3.20082 | -5.24711 | 0.63788  |
| H | 4.04557 | -4.10385 | 1.69698  |
| C | 3.68927 | -1.25634 | 2.19870  |
| H | 4.56764 | -1.92064 | 2.20702  |
| H | 4.07794 | -0.23134 | 2.30736  |
| C | 2.76814 | -1.60340 | 3.37064  |
| H | 1.88876 | -0.94547 | 3.40600  |
| H | 3.30959 | -1.50431 | 4.32609  |
| H | 2.40150 | -2.64050 | 3.30784  |
| C | 4.40287 | -1.13651 | -0.62849 |
| H | 4.14658 | -1.68470 | -1.55156 |
| H | 4.40296 | -0.07137 | -0.90533 |
| C | 5.80626 | -1.52477 | -0.14497 |
| H | 6.12621 | -0.91284 | 0.71267  |
| H | 6.54031 | -1.36032 | -0.95187 |
| H | 5.87790 | -2.58013 | 0.15407  |

DFT-derived structures and energies for compounds 6a-6d:

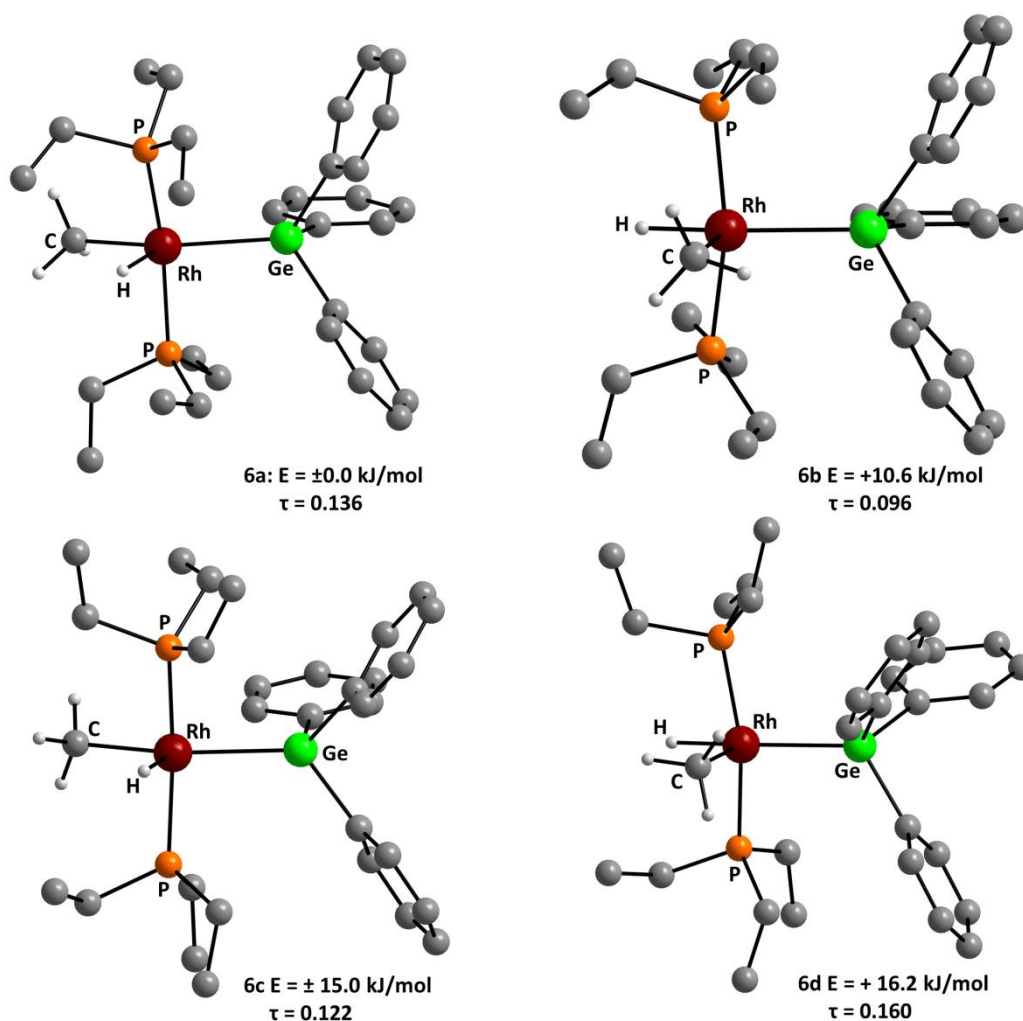

**Figure 2.** DFT-optimized structures of complex  $[\text{Rh}(\text{GePh}_3)(\text{H})(\text{CH}_3)(\text{PET}_3)_2]$  (**6 a-d**) and their energies. The hydrogen atoms of the germyl ligand as well as of the phosphine ligands have been omitted for clarity.

Computational details for compounds **6a-6d** are given in the main text.

Optimized cartesian coordinates for complex [Rh(GePh<sub>3</sub>)(H)(CH<sub>3</sub>)(PEt<sub>3</sub>)<sub>2</sub>] (**6a**), energies are corrected for zero-point energy and given in Hartree:

Energy: -2297.913066

|    |          |          |          |
|----|----------|----------|----------|
| Rh | 1.07791  | 1.10933  | 0.18155  |
| C  | 2.46639  | 2.37089  | 1.16357  |
| H  | 2.69219  | 1.83484  | 2.09188  |
| H  | 2.03749  | 3.33338  | 1.43157  |
| H  | 3.40820  | 2.56411  | 0.65292  |
| H  | 1.78175  | 1.66832  | -1.03571 |
| Ge | -0.87210 | -0.68670 | -0.07134 |
| C  | -1.11869 | -1.43343 | 1.78563  |
| C  | -0.60643 | -2.28882 | -1.26162 |
| C  | -2.80844 | -0.23422 | -0.45973 |
| C  | -0.46591 | -0.82535 | 2.87267  |
| C  | -1.99562 | -2.49628 | 2.08159  |
| C  | -0.65998 | -1.25406 | 4.19237  |
| C  | -1.52214 | -2.32121 | 4.45490  |
| C  | -2.19106 | -2.94097 | 3.39335  |
| C  | -0.41347 | -3.59579 | -0.77544 |
| C  | -0.33854 | -3.18831 | -3.53117 |
| C  | -0.15531 | -4.47792 | -3.02180 |
| C  | -0.18869 | -4.67568 | -1.63904 |
| C  | -0.55106 | -2.11456 | -2.66016 |
| C  | -3.63623 | 0.23853  | 0.57862  |
| C  | -3.39129 | -0.34277 | -1.73696 |
| C  | -4.72517 | 0.01302  | -1.97054 |
| C  | -4.97050 | 0.59747  | 0.35458  |
| C  | -5.52139 | 0.49057  | -0.92571 |
| H  | -2.87573 | -3.77063 | 3.58978  |
| H  | -0.13875 | -0.75382 | 5.01313  |
| H  | -1.67789 | -2.66472 | 5.48061  |
| H  | -2.54995 | -2.98102 | 1.27355  |
| H  | 0.21136  | 0.01815  | 2.69066  |
| H  | -0.43767 | -3.78399 | 0.30039  |
| H  | -0.04255 | -5.67794 | -1.22654 |
| H  | -0.30928 | -3.01622 | -4.61067 |
| H  | 0.01502  | -5.31982 | -3.69735 |
| H  | -0.65678 | -1.11245 | -3.08673 |
| H  | -5.14511 | -0.09061 | -2.97502 |
| H  | -5.58370 | 0.95406  | 1.18702  |
| H  | -6.56330 | 0.76721  | -1.10515 |
| H  | -2.80487 | -0.72667 | -2.57416 |
| H  | -3.23990 | 0.31048  | 1.59526  |
| P  | 2.75269  | -0.56972 | 0.02502  |
| P  | -0.35904 | 2.92191  | -0.16897 |
| C  | 4.48875  | 0.07124  | 0.20511  |
| C  | 2.81820  | -1.43502 | -1.60870 |
| C  | 5.64057  | -0.92422 | 0.02336  |
| C  | 2.99186  | -0.51874 | -2.82328 |
| C  | 0.44583  | 4.59443  | -0.33812 |
| C  | -1.44763 | 2.84656  | -1.66742 |
| C  | 2.71878  | -2.00740 | 1.20013  |
| C  | 3.08799  | -1.66117 | 2.64686  |
| C  | 1.58059  | 4.73073  | -1.35704 |
| C  | -0.79146 | 2.37434  | -2.96863 |
| C  | -1.61628 | 3.31501  | 1.13844  |

|   |          |          |          |
|---|----------|----------|----------|
| C | -1.06112 | 3.41722  | 2.56279  |
| H | 4.54837  | 0.54316  | 1.19679  |
| H | 4.58050  | 0.89789  | -0.51671 |
| H | 1.88050  | -1.99966 | -1.69573 |
| H | 3.63296  | -2.17611 | -1.56537 |
| H | 6.60657  | -0.41944 | 0.18811  |
| H | 5.66677  | -1.35204 | -0.99057 |
| H | 5.58516  | -1.76119 | 0.73698  |
| H | 2.17184  | 0.21264  | -2.88978 |
| H | 2.98998  | -1.11304 | -3.75082 |
| H | 3.94061  | 0.04190  | -2.79136 |
| H | 3.39164  | -2.78872 | 0.80947  |
| H | 1.69826  | -2.41721 | 1.15550  |
| H | 4.13359  | -1.32622 | 2.73649  |
| H | 2.96521  | -2.54345 | 3.29455  |
| H | 2.44356  | -0.86695 | 3.05250  |
| H | 0.81435  | 4.86993  | 0.66218  |
| H | -0.36749 | 5.30285  | -0.57211 |
| H | -2.26261 | 2.15753  | -1.40165 |
| H | -1.89930 | 3.84531  | -1.79718 |
| H | -0.31412 | 1.39141  | -2.83234 |
| H | -0.02143 | 3.07203  | -3.33172 |
| H | -1.55086 | 2.27644  | -3.76091 |
| H | 2.38663  | 4.00951  | -1.15749 |
| H | 2.01363  | 5.74328  | -1.31306 |
| H | 1.23069  | 4.56865  | -2.38772 |
| H | -2.37786 | 2.52287  | 1.08400  |
| H | -2.11602 | 4.25554  | 0.84800  |
| H | -0.60908 | 2.46645  | 2.88524  |
| H | -1.86809 | 3.65908  | 3.27274  |
| H | -0.29352 | 4.20178  | 2.65736  |

Optimized cartesian coordinates for complex [Rh(GePh<sub>3</sub>)(H)(CH<sub>3</sub>)(PEt<sub>3</sub>)<sub>2</sub>] (**6b**), energies are corrected for zero-point energy and given in Hartree:

Energy: -2297.909020

|    |          |          |          |
|----|----------|----------|----------|
| Rh | 1.12679  | 1.03586  | -0.06979 |
| C  | 1.66316  | 1.42499  | -2.02878 |
| H  | 2.31170  | 2.05907  | 0.13866  |
| H  | 1.10344  | 0.68703  | -2.60146 |
| H  | 2.72816  | 1.30361  | -2.21044 |
| H  | 1.37712  | 2.42382  | -2.33857 |
| Ge | -0.90357 | -0.70022 | -0.02425 |
| C  | -1.33575 | -1.48577 | 1.78359  |
| C  | -0.64251 | -2.32296 | -1.19349 |
| C  | -2.76200 | -0.10406 | -0.56113 |
| C  | -0.64181 | -1.08324 | 2.93773  |
| C  | -2.37630 | -2.42104 | 1.95976  |
| C  | -0.95220 | -1.58989 | 4.20707  |
| C  | -1.97927 | -2.52497 | 4.35083  |
| C  | -2.69312 | -2.93788 | 3.22012  |
| C  | -0.60102 | -3.63773 | -0.68994 |
| C  | -0.22360 | -3.26016 | -3.42478 |
| C  | -0.19394 | -4.55579 | -2.89968 |
| C  | -0.37900 | -4.73895 | -1.52642 |
| C  | -0.43569 | -2.16563 | -2.57911 |
| C  | -3.66641 | 0.37184  | 0.40981  |
| C  | -3.19766 | -0.08079 | -1.89983 |

|   |          |          |          |
|---|----------|----------|----------|
| C | -4.46321 | 0.40042  | -2.25517 |
| C | -4.93356 | 0.85696  | 0.06460  |
| C | -5.33735 | 0.87746  | -1.27372 |
| H | -3.50515 | -3.66320 | 3.32162  |
| H | -0.39218 | -1.25058 | 5.08299  |
| H | -2.22735 | -2.92589 | 5.33681  |
| H | -2.95997 | -2.74813 | 1.09513  |
| H | 0.16039  | -0.34543 | 2.85099  |
| H | -0.74635 | -3.81283 | 0.37847  |
| H | -0.35518 | -5.74634 | -1.10124 |
| H | -0.07599 | -3.10001 | -4.49650 |
| H | -0.02654 | -5.41414 | -3.55511 |
| H | -0.43059 | -1.16276 | -3.01664 |
| H | -4.76958 | 0.39612  | -3.30508 |
| H | -5.61063 | 1.21257  | 0.84654  |
| H | -6.32672 | 1.25201  | -1.54807 |
| H | -2.54704 | -0.46021 | -2.69094 |
| H | -3.38751 | 0.34690  | 1.46702  |
| P | 2.84373  | -0.57360 | 0.13868  |
| P | -0.22052 | 2.95007  | 0.09040  |
| C | 4.52914  | 0.19410  | -0.03108 |
| C | 2.95798  | -2.08737 | -0.92482 |
| C | 5.75405  | -0.70281 | 0.17762  |
| C | 3.26039  | -1.83769 | -2.40625 |
| C | 0.69111  | 4.57235  | 0.13033  |
| C | -1.65181 | 3.28512  | -1.04394 |
| C | 2.89213  | -1.33814 | 1.82852  |
| C | 3.11720  | -0.34859 | 2.97732  |
| C | 1.59335  | 4.92266  | -1.05617 |
| C | -1.41143 | 3.15839  | -2.55106 |
| C | -1.10290 | 3.04550  | 1.72206  |
| C | -0.20985 | 2.94526  | 2.96284  |
| H | 4.53666  | 1.03750  | 0.67655  |
| H | 4.55514  | 0.65653  | -1.03097 |
| H | 1.99518  | -2.60908 | -0.82194 |
| H | 3.72863  | -2.74229 | -0.48393 |
| H | 6.68027  | -0.11537 | 0.06830  |
| H | 5.80093  | -1.52379 | -0.55468 |
| H | 5.77131  | -1.15252 | 1.18314  |
| H | 2.47078  | -1.24350 | -2.88624 |
| H | 3.31991  | -2.79731 | -2.94302 |
| H | 4.21875  | -1.31355 | -2.55327 |
| H | 3.67404  | -2.11539 | 1.83637  |
| H | 1.92881  | -1.85626 | 1.95554  |
| H | 4.11927  | 0.10688  | 2.93618  |
| H | 3.02441  | -0.85903 | 3.94899  |
| H | 2.38380  | 0.47305  | 2.95995  |
| H | 1.30349  | 4.53677  | 1.04581  |
| H | -0.06672 | 5.36115  | 0.28261  |
| H | -2.43270 | 2.57101  | -0.74283 |
| H | -2.02402 | 4.29443  | -0.79390 |
| H | -1.07510 | 2.14585  | -2.81631 |
| H | -0.66406 | 3.87560  | -2.92428 |
| H | -2.35145 | 3.34641  | -3.09359 |
| H | 2.37799  | 4.16422  | -1.19501 |
| H | 2.08906  | 5.89131  | -0.88087 |
| H | 1.03024  | 5.00957  | -1.99799 |
| H | -1.83809 | 2.22643  | 1.71652  |
| H | -1.67740 | 3.98803  | 1.73749  |

|   |          |         |         |
|---|----------|---------|---------|
| H | 0.38104  | 2.01581 | 2.96076 |
| H | -0.82297 | 2.94397 | 3.87798 |
| H | 0.49426  | 3.78865 | 3.03827 |

Optimized cartesian coordinates for complex  
[Rh(GePh<sub>3</sub>)(H)(CH<sub>3</sub>)(PEt<sub>3</sub>)<sub>2</sub>] (6c), energies are corrected  
for zero-point energy and given in Hartree:

Energy: -2297.907361

|    |          |          |          |
|----|----------|----------|----------|
| Rh | 0.17447  | -1.56684 | 0.09110  |
| Ge | -0.14297 | 1.06031  | -0.04927 |
| C  | -0.07086 | 1.51516  | 1.91586  |
| C  | -1.85616 | 2.01300  | -0.56464 |
| C  | 1.21871  | 2.26958  | -0.91957 |
| C  | -2.12100 | 2.42288  | -1.88639 |
| C  | -3.33094 | 3.02712  | -2.24407 |
| C  | -4.32395 | 3.23916  | -1.28256 |
| C  | -4.08524 | 2.84860  | 0.03767  |
| C  | -2.86895 | 2.24763  | 0.38639  |
| C  | 2.09220  | 3.10537  | -0.19719 |
| C  | 3.02134  | 3.93275  | -0.84139 |
| C  | 3.10261  | 3.95027  | -2.23629 |
| C  | 2.25335  | 3.12325  | -2.97805 |
| C  | 1.33574  | 2.29400  | -2.32428 |
| C  | -0.12485 | 2.82475  | 2.43261  |
| C  | -0.11527 | 3.07090  | 3.81005  |
| C  | -0.06276 | 2.00573  | 4.71596  |
| C  | -0.02337 | 0.69519  | 4.23306  |
| C  | -0.02660 | 0.46493  | 2.85128  |
| H  | -1.36738 | 2.27842  | -2.66334 |
| H  | -3.49657 | 3.33742  | -3.27959 |
| H  | -5.27015 | 3.71123  | -1.55853 |
| H  | -4.84516 | 3.01961  | 0.80548  |
| H  | -2.70300 | 1.97574  | 1.43182  |
| H  | 2.04795  | 3.12318  | 0.89428  |
| H  | 3.68070  | 4.57171  | -0.24716 |
| H  | 3.82212  | 4.59968  | -2.74101 |
| H  | 2.30749  | 3.12063  | -4.07026 |
| H  | 0.69909  | 1.64523  | -2.93368 |
| H  | -0.18818 | 3.67312  | 1.74588  |
| H  | -0.15528 | 4.09949  | 4.17900  |
| H  | -0.05864 | 2.19649  | 5.79201  |
| H  | 0.00899  | -0.14713 | 4.92932  |
| H  | -0.00367 | -0.57696 | 2.50005  |
| P  | -2.11663 | -1.98149 | -0.19244 |
| P  | 2.52290  | -1.39091 | -0.17320 |
| C  | -2.60911 | -3.76104 | -0.38109 |
| C  | -2.82616 | -1.19214 | -1.71582 |
| C  | -4.14371 | -1.71352 | -2.30428 |
| C  | -1.90602 | -4.50748 | -1.51931 |
| C  | -3.13970 | -1.44257 | 1.25980  |
| C  | -4.66718 | -1.57268 | 1.22346  |
| C  | 3.51269  | -0.26449 | 0.91816  |
| C  | 2.92248  | -0.87449 | -1.91917 |
| C  | 3.54009  | -0.68014 | 2.39358  |
| C  | 4.21444  | -0.09695 | -2.19658 |
| C  | 3.41662  | -3.01343 | -0.01144 |
| C  | 4.92052  | -3.05590 | -0.30452 |
| H  | -2.90876 | -0.12234 | -1.47869 |

|   |          |          |          |   |          |          |          |
|---|----------|----------|----------|---|----------|----------|----------|
| H | -2.02410 | -1.26255 | -2.46818 | C | 0.41081  | 1.21915  | 2.85387  |
| H | -2.40781 | -4.25903 | 0.57952  | H | -1.87964 | 2.04824  | -2.57189 |
| H | -3.70074 | -3.78925 | -0.52288 | H | -4.21459 | 2.71277  | -2.97663 |
| H | -2.72610 | -2.01804 | 2.10638  | H | -5.83918 | 2.84662  | -1.08288 |
| H | -2.85829 | -0.39543 | 1.44448  | H | -5.06196 | 2.32840  | 1.23577  |
| H | -4.97659 | -1.66293 | -1.58841 | H | -2.71897 | 1.67694  | 1.64647  |
| H | -4.06638 | -2.75411 | -2.65537 | H | 1.80322  | 3.50628  | 0.09321  |
| H | -4.42455 | -1.09735 | -3.17413 | H | 3.14843  | 4.75709  | -1.55252 |
| H | -0.81846 | -4.54002 | -1.36177 | H | 2.99890  | 4.21073  | -3.98488 |
| H | -2.08804 | -4.03124 | -2.49614 | H | 1.47844  | 2.37632  | -4.73869 |
| H | -2.27228 | -5.54469 | -1.58489 | H | 0.15084  | 1.10817  | -3.09684 |
| H | -5.00043 | -2.59788 | 0.99783  | H | -0.44565 | 3.99265  | 1.08904  |
| H | -5.11238 | -0.89511 | 0.47991  | H | -0.14205 | 5.02596  | 3.31160  |
| H | -5.08878 | -1.30013 | 2.20483  | H | 0.50266  | 3.62543  | 5.27606  |
| H | 3.07417  | 0.73834  | 0.81012  | H | 0.83807  | 1.16883  | 4.97747  |
| H | 4.53864  | -0.20179 | 0.52378  | H | 0.55342  | 0.13889  | 2.74874  |
| H | 2.89553  | -1.81187 | -2.50169 | P | -1.90854 | -2.20226 | 0.04179  |
| H | 2.06274  | -0.28097 | -2.25448 | P | 2.67007  | -1.31111 | 0.08600  |
| H | 3.21918  | -3.38020 | 1.00702  | C | -2.13028 | -4.04420 | -0.00038 |
| H | 2.88011  | -3.70681 | -0.67828 | C | -3.12315 | -1.55417 | -1.20301 |
| H | 5.11834  | -0.63957 | -1.88236 | C | -4.40895 | -2.34149 | -1.48588 |
| H | 4.20923  | 0.88236  | -1.69647 | C | -1.57581 | -4.74276 | -1.24565 |
| H | 4.30409  | 0.09542  | -3.27819 | C | -2.57884 | -1.76996 | 1.71941  |
| H | 2.52764  | -0.74226 | 2.81918  | C | -4.02083 | -2.14080 | 2.08553  |
| H | 4.09882  | 0.06157  | 2.98631  | C | 3.25851  | -0.98567 | 1.81416  |
| H | 4.03250  | -1.65496 | 2.53951  | C | 3.57612  | -0.07166 | -0.96642 |
| H | 5.49219  | -2.36875 | 0.33907  | C | 2.71296  | -1.97220 | 2.85368  |
| H | 5.14488  | -2.79979 | -1.35086 | C | 4.88579  | 0.53228  | -0.44308 |
| H | 5.31178  | -4.07095 | -0.12558 | C | 3.47210  | -2.92768 | -0.35924 |
| C | 0.41921  | -3.47195 | 0.99107  | C | 5.00055  | -3.03057 | -0.36005 |
| H | -0.52011 | -3.84463 | 1.39825  | H | -3.35602 | -0.53059 | -0.87426 |
| H | 1.10049  | -3.30876 | 1.83128  | H | -2.55401 | -1.43119 | -2.13785 |
| H | 0.84314  | -4.26237 | 0.37232  | H | -1.61294 | -4.41986 | 0.89787  |
| H | 0.28290  | -2.31884 | -1.21788 | H | -3.19996 | -4.27687 | 0.12331  |

Optimized cartesian coordinates for compound [Rh(GePh<sub>3</sub>)(H)(CH<sub>3</sub>)(PEt<sub>3</sub>)<sub>2</sub>] (**6d**), energies are corrected for zero-point energy and given in Hartree:

Energy: -2297.906895

|    |          |          |          |
|----|----------|----------|----------|
| Rh | 0.32195  | -1.48146 | -0.05888 |
| Ge | -0.22901 | 1.10195  | -0.06673 |
| C  | 0.06044  | 1.98307  | 1.72638  |
| C  | -2.10544 | 1.77049  | -0.43219 |
| C  | 0.84431  | 2.21470  | -1.36079 |
| C  | -2.56755 | 2.08628  | -1.72423 |
| C  | -3.89331 | 2.46879  | -1.96000 |
| C  | -4.80374 | 2.54739  | -0.90166 |
| C  | -4.36779 | 2.25287  | 0.39380  |
| C  | -3.03868 | 1.87418  | 0.61911  |
| C  | 1.71567  | 3.24783  | -0.96462 |
| C  | 2.48432  | 3.95844  | -1.89520 |
| C  | 2.40264  | 3.65465  | -3.25711 |
| C  | 1.55020  | 2.62895  | -3.67706 |
| C  | 0.79121  | 1.91982  | -2.73935 |
| C  | -0.14227 | 3.36322  | 1.92990  |
| C  | 0.01985  | 3.95149  | 3.18846  |
| C  | 0.37926  | 3.16818  | 4.29107  |
| C  | 0.56929  | 1.79489  | 4.12195  |

|   |          |          |          |
|---|----------|----------|----------|
| H | -1.87964 | 2.04824  | -2.57189 |
| H | -4.21459 | 2.71277  | -2.97663 |
| H | -5.83918 | 2.84662  | -1.08288 |
| H | -5.06196 | 2.32840  | 1.23577  |
| H | -2.71897 | 1.67694  | 1.64647  |
| H | 1.80322  | 3.50628  | 0.09321  |
| H | 3.14843  | 4.75709  | -1.55252 |
| H | 2.99890  | 4.21073  | -3.98488 |
| H | 1.47844  | 2.37632  | -4.73869 |
| H | 0.15084  | 1.10817  | -3.09684 |
| H | -0.44565 | 3.99265  | 1.08904  |
| H | -0.14205 | 5.02596  | 3.31160  |
| H | 0.50266  | 3.62543  | 5.27606  |
| H | 0.83807  | 1.16883  | 4.97747  |
| H | 0.55342  | 0.13889  | 2.74874  |
| P | -1.90854 | -2.20226 | 0.04179  |
| P | 2.67007  | -1.31111 | 0.08600  |
| C | -2.13028 | -4.04420 | -0.00038 |
| C | -3.12315 | -1.55417 | -1.20301 |
| C | -4.40895 | -2.34149 | -1.48588 |
| C | -1.57581 | -4.74276 | -1.24565 |
| C | -2.57884 | -1.76996 | 1.71941  |
| C | -4.02083 | -2.14080 | 2.08553  |
| C | 3.25851  | -0.98567 | 1.81416  |
| C | 3.57612  | -0.07166 | -0.96642 |
| C | 2.71296  | -1.97220 | 2.85368  |
| C | 4.88579  | 0.53228  | -0.44308 |
| C | 3.47210  | -2.92768 | -0.35924 |
| C | 5.00055  | -3.03057 | -0.36005 |
| H | -3.35602 | -0.53059 | -0.87426 |
| H | -2.55401 | -1.43119 | -2.13785 |
| H | -1.61294 | -4.41986 | 0.89787  |
| H | -3.19996 | -4.27687 | 0.12331  |
| H | -1.87431 | -2.23717 | 2.42991  |
| H | -2.43657 | -0.68368 | 1.81964  |
| H | -5.02825 | -2.47819 | -0.58739 |
| H | -4.20501 | -3.33833 | -1.90667 |
| H | -5.01928 | -1.79478 | -2.22303 |
| H | -0.49142 | -4.58218 | -1.33392 |
| H | -2.04844 | -4.37695 | -2.17163 |
| H | -1.75722 | -5.82822 | -1.19002 |
| H | -4.21920 | -3.21902 | 1.98370  |
| H | -4.74734 | -1.59729 | 1.46336  |
| H | -4.22233 | -1.86855 | 3.13447  |
| H | 2.94128  | 0.03997  | 2.05969  |
| H | 4.35959  | -0.98997 | 1.82805  |
| H | 3.74193  | -0.57451 | -1.93461 |
| H | 2.86219  | 0.73751  | -1.16742 |
| H | 3.02957  | -3.66943 | 0.32374  |
| H | 3.07308  | -3.17640 | -1.35607 |
| H | 5.65666  | -0.22322 | -0.22991 |
| H | 4.72274  | 1.11684  | 0.47537  |
| H | 5.29699  | 1.22456  | -1.19543 |
| H | 1.61118  | -1.98992 | 2.86256  |
| H | 3.05179  | -1.69356 | 3.86417  |
| H | 3.05370  | -3.00185 | 2.66105  |
| H | 5.43619  | -2.78929 | 0.62269  |
| H | 5.45993  | -2.36280 | -1.10474 |

|   |          |          |          |
|---|----------|----------|----------|
| H | 5.31123  | -4.05848 | -0.60950 |
| C | 0.49185  | -1.83588 | -2.08571 |
| H | -0.49068 | -1.76164 | -2.54724 |
| H | 0.91484  | -2.81353 | -2.30323 |
| H | 1.13127  | -1.05458 | -2.49213 |
| H | 0.63932  | -3.03399 | 0.09528  |

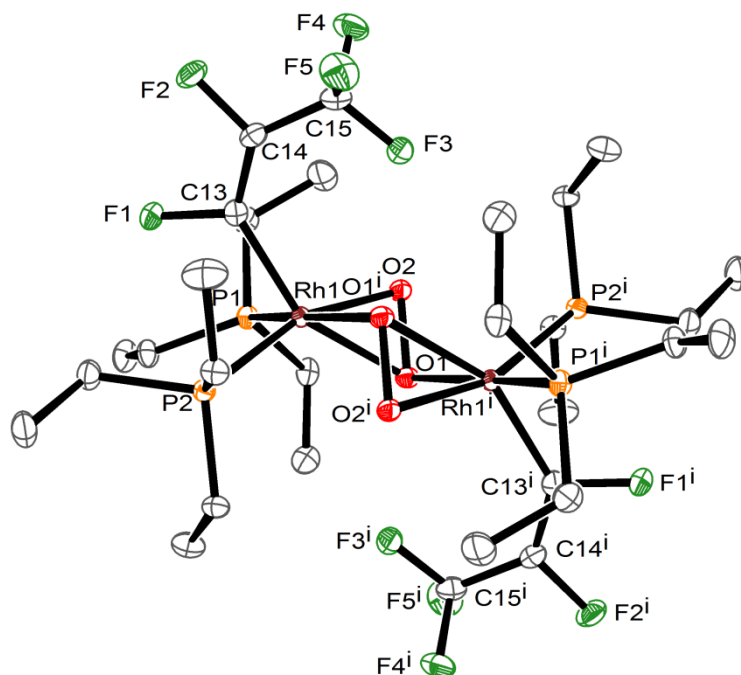

**Figure 3.** An ORTEP diagram of **14a**. Ellipsoids are drawn at the 50% probability level. C–H hydrogen atoms were omitted for clarity.

The molecular structure of **14b** in the solid state was determined by X-ray crystallography (Figure 4). Yellow crystals (needles) were obtained from toluene/*n*-hexane solution at 243 K. Selected bond lengths and angles are summarized in Table 1.

The molecular structure in the solid state of **14a** and **14b** differs in the coordination geometry at the rhodium metal center as well as in the conformation of the ethyl groups of the phosphine ligands. In the case of **14a** the peroxide unit is directed towards the back whereas in **14b** it is directed towards the front.

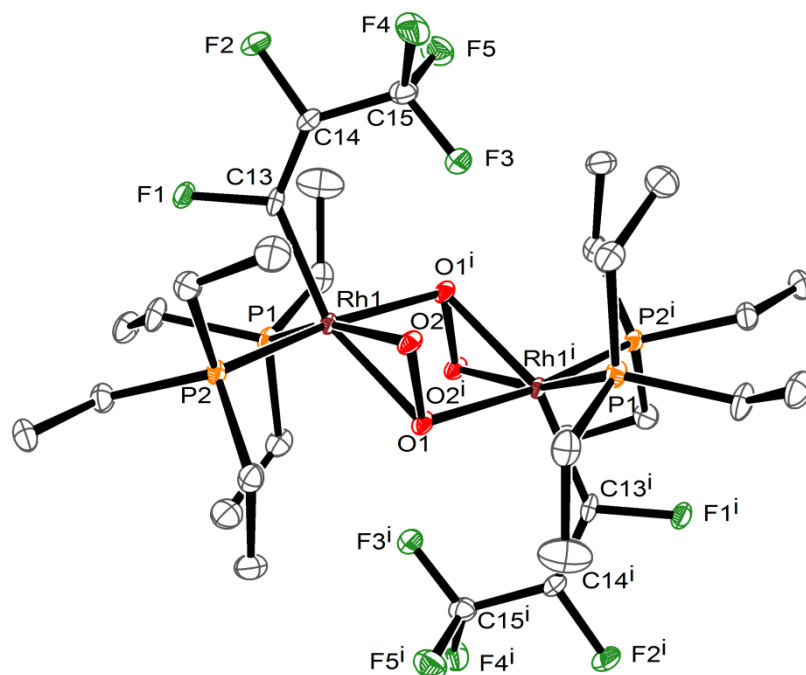

**Figure 4.** An ORTEP diagram of **14b**. Ellipsoids are drawn at the 50% probability level. The ethyl groups of the phosphine ligands atoms were omitted for clarity.

**Table 1.** Selected bond lengths [Å] and angles [°] in  $[\text{Rh}\{(E)\text{-CF}=\text{CF}(\text{CF}_3)(\mu\text{-}\kappa^1\text{:}\eta^2\text{-O}_2)(\text{PEt}_3)_2\}]_2$  (**14b**).

| Lengths [Å]             |            |                                       |            |
|-------------------------|------------|---------------------------------------|------------|
| Rh1–O1                  | 2.1556(14) | O2–O2 <sup>i</sup>                    | 3.558(2)   |
| Rh1 <sup>i</sup> –O1    | 2.0957(15) | O1–O2 <sup>i</sup>                    | 2.784(2)   |
| Rh1–O2                  | 2.0031(15) | C13–C14                               | 1.323(3)   |
| Rh1–P1                  | 2.3497(6)  | C13–F1                                | 1.392(2)   |
| Rh1–P2                  | 2.2868(6)  | C14–F2                                | 1.380(3)   |
| Rh1–C13                 | 1.991(2)   | Rh1–O <sub>middle</sub>               | 1.9480(13) |
| O1–O2                   | 1.463(2)   | Rh1 <sup>i</sup> –O <sub>middle</sub> | 2.3598(13) |
| O1–O1 <sup>i</sup>      | 2.668(2)   |                                       |            |
| Angles [°]              |            |                                       |            |
| O1–Rh1–P1               | 121.00(4)  | O2–O1–Rh1                             | 63.90(8)   |
| O1–Rh1–P2               | 90.95(4)   | O2 <sup>i</sup> –O1 <sup>i</sup> –Rh1 | 101.89(10) |
| O2–Rh1–P1               | 161.65(5)  | O2–Rh1–C13                            | 108.41(8)  |
| O2–Rh1–P2               | 82.02(5)   | C13–Rh1–O1                            | 149.00(8)  |
| P2–Rh1–P1               | 104.81(2)  | C13–Rh1–O1 <sup>i</sup>               | 98.49(8)   |
| O2–Rh1–O1               | 40.99(6)   | C13–Rh1–P1                            | 89.03(7)   |
| O1–Rh1–O1 <sup>i</sup>  | 77.72(6)   | C13–Rh1–P2                            | 88.14(7)   |
| O2–Rh1–O1 <sup>i</sup>  | 85.51(6)   | Rh1–O1–Rh1 <sup>i</sup>               | 102.28(6)  |
| O1 <sup>i</sup> –Rh1–P1 | 86.32(4)   | O1–O2–Rh1                             | 75.11(9)   |
| O1 <sup>i</sup> –Rh1–P2 | 167.22(4)  |                                       |            |

- [1] M. J. Frisch, G. W. Trucks, H. B. Schlegel, G. E. Scuseria, M. A. Robb, J. R. Cheeseman, G. Scalmani, V. Barone, B. Mennucci, G. A. Petersson, H. Nakatsuji, M. Caricato, X. Li, H. P. Hratchian, A. F. Izmaylov, J. Bloino, G. Zheng, J. L. Sonnenberg, M. Hada, M. Ehara, K. Toyota, R. Fukuda, J. Hasegawa, M. Ishida, T. Nakajima, Y. Honda, O. Kitao, H. Nakai, T. Vreven, J. A. Montgomery, Jr., J. E. Peralta, F. Ogliaro, M. Bearpark, J. J. Heyd, E. Brothers, K. N. Kudin, V. N. Staroverov, R. Kobayashi, J. Normand, K. Raghavachari, A. Rendell, J. C. Burant, S. S. Iyengar, J. Tomasi, M.

Cossi, N. Rega, J. M. Millam, M. Klene, J. E. Knox, J. B. Cross, V. Bakken, C. Adamo, J. Jaramillo, R. Gomperts, R. E. Stratmann, O. Yazyev, A. J. Austin, R. Cammi, C. Pomelli, J. W. Ochterski, R. L. Martin, K. Morokuma, V. G. Zakrzewski, G. A. Voth, P. Salvador, J. J. Dannenberg, S. Dapprich, A. D. Daniels, Ö. Farkas, J. B. Foresman, J. V. Ortiz, J. Cioslowski and D. J. Fox, *Gaussian 09, Revision D.01*, Gaussian, Inc., Wallingford CT, 2013.

[2] K. A. Peterson, D. Figgen, M. Dolg and H. Stoll, *J. Chem. Phys.*, 2007, **126**, 124101.

[3] K. A. Peterson, *J. Chem. Phys.*, 2003, **119**, 11099-11112.
